# Supplementary material for: OH measurements in the coastal atmosphere of South China: possible missing OH sinks in aged air masses
Source: Copernicus journal article supplement (doi:10.5194/acp-23-7057-2023), 2023-06-26
Supplement: Supplementary file 1 [file acp-23-7057-2023-supplement.pdf]

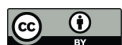

*Supplement of*

## **OH measurements in the coastal atmosphere of South China: possible missing OH sinks in aged air masses**

**Zhouxing Zou et al.**

*Correspondence to:* Tao Wang (tao.wang@polyu.edu.hk)

The copyright of individual parts of the supplement might differ from the article licence.

1

### Supplementary Information

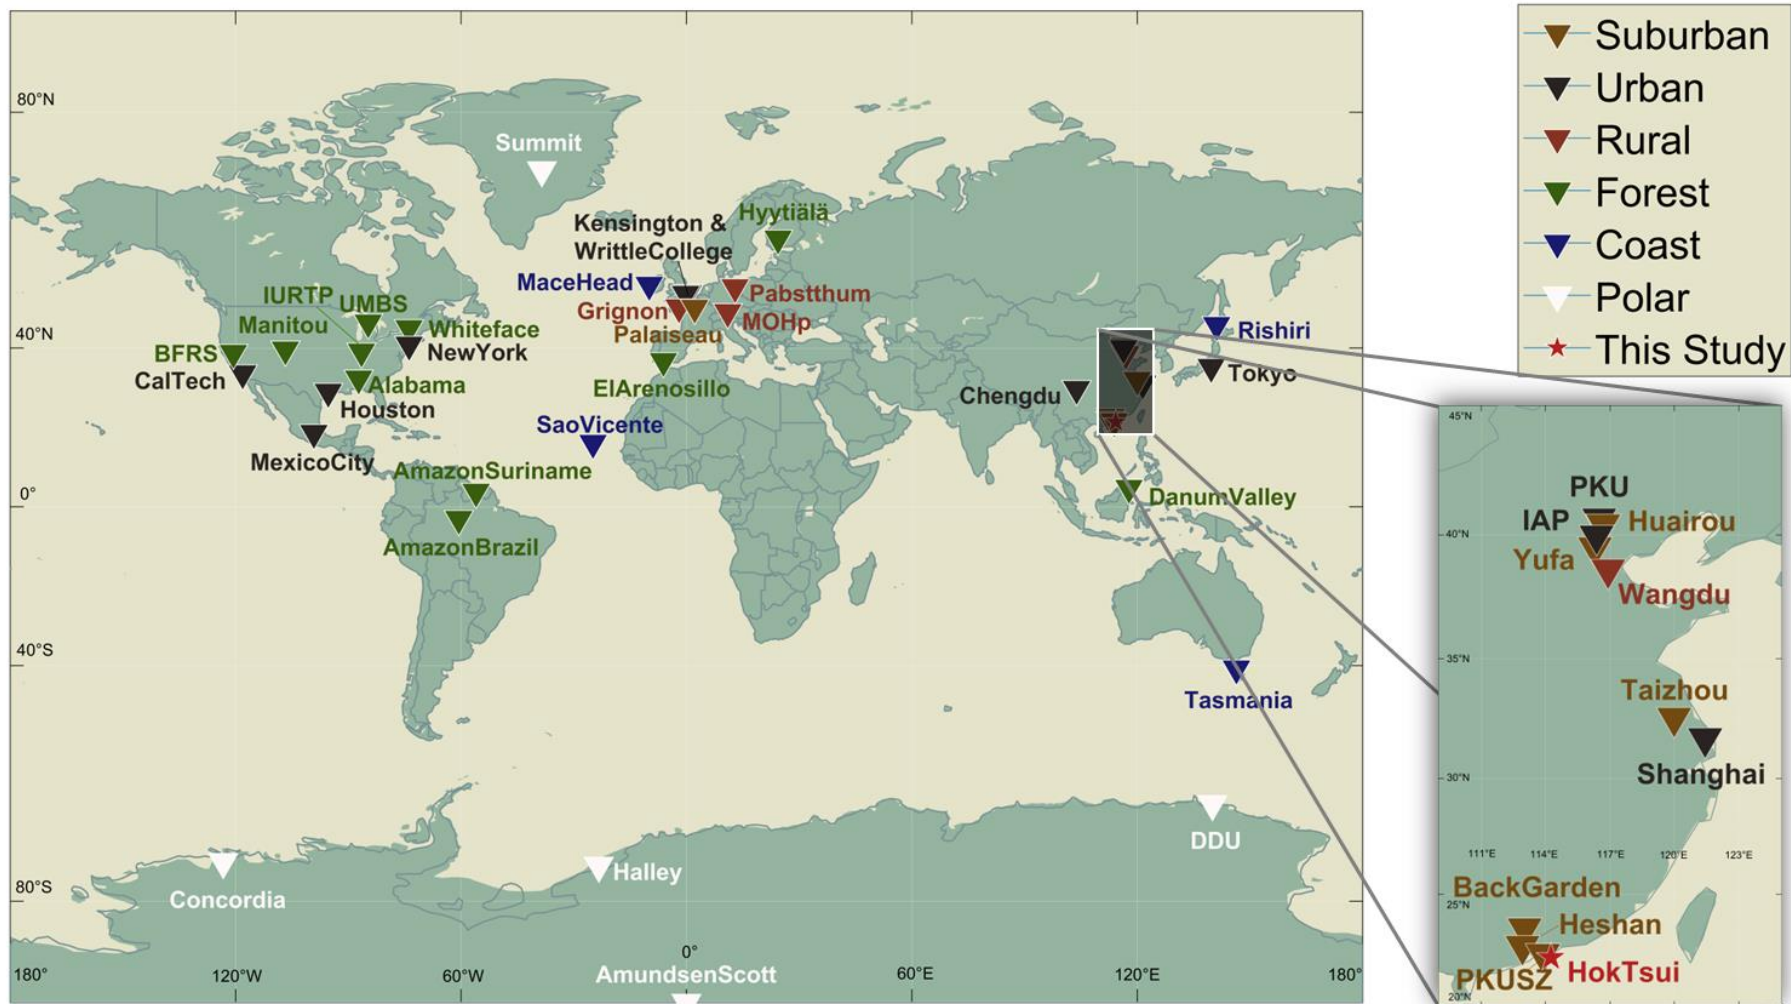

2

3 Figure S1. OH measurements gathered around the world to date.

1

1 Table S1. Summary of studies reporting OH and HO<sub>2</sub> measurements and comparing them with model predictions (refer to Figure S1 for site locations)

| Comparison results (OH only) | Reference                                        | Time              | Location in Figure 1 | Site types   | Measurement notes                                     | OH conc. 10 <sup>6</sup> cm <sup>-3</sup> | HO <sub>2</sub> conc. 10 <sup>8</sup> cm <sup>-3</sup> | Ratio notes                                                                                      | OH R <sub>SO</sub>             | HO <sub>2</sub> R <sub>SO</sub> | Other references targeting the same site                |
|------------------------------|--------------------------------------------------|-------------------|----------------------|--------------|-------------------------------------------------------|-------------------------------------------|--------------------------------------------------------|--------------------------------------------------------------------------------------------------|--------------------------------|---------------------------------|---------------------------------------------------------|
| Overprediction               | Berresheim et al., 2002                          | June–July 1999    | MaceHead             | Coast        | Mean (All)<br>Peaks (Mean Clean)<br>Peaks (Pollution) | 0.12<br>2.5<br>18 & 12                    | N/A                                                    | Mean (17 June, Coastal)<br>Mean (30 July, Continental)                                           | 2<br>~1                        | N/A                             | Carslaw et al., 1999;<br>Berresheim et al., 2013, 2014; |
| Overprediction               | Sommariva et al., 2004;<br>Creasey et al., 2003; | Jan–Feb 1999      | Tasmania             | Coast        | Mean (Peaks)<br>Peaks (Range)                         | 3.5<br>2 to 5.5                           | 2<br>1 to 2.5                                          | Mean (7–8 Feb)<br>Mean (15–16 Feb)                                                               | ~1.11<br>~1.32                 | N/A<br>~2                       | N/A                                                     |
| Overprediction               | Kanaya et al., 2007                              | September 2003    | Rishiri              | Island Coast | Peaks (Mean)                                          | 2.7                                       | 1.45                                                   | OH rectified by constrained HO <sub>2</sub>                                                      | 1.35                           | 1.89                            | N/A                                                     |
| Overprediction               | Mauldin III et al., 2010                         | Nov–Jan 2003-04   | AmundsenScott        | Antarctica   | Mean (Range)                                          | 1.5 to 2.5                                | N/A                                                    | Mean                                                                                             | ~2                             | N/A                             | Mauldin III et al., 2001                                |
| Overprediction               | Kukui et al., 2014                               | Dec–Jan 2011-2012 | Concordia            | Antarctica   | Mean (All)<br>Peaks (Mean)<br>Mean (range)            | 3.1<br>5.2<br>0.3 to 7.5                  | 0.99*<br>1.7*<br>0.1 to 2*                             | Mean (w/PSS HONO)<br>Mean (w/measured HONO)                                                      | 0.72<br>2.19                   | 1.02*<br>1.84*                  | N/A                                                     |
| Overprediction               | Dusanter et al., 2009a, b;                       | March 2006        | MexicoCity           | Urban        | Peaks (Range)<br>Peaks (Mean)                         | 2 to 15<br>4.6                            | 0.56 to 4.5<br>1.9                                     | Mean (13:00 w/o glyoxal)<br>Mean (Morning, polluted)<br>Mean (11:00–14:30)<br>Mean (After 14:30) | 2.4<br>~0.5 to ~1<br>1.7<br>~1 | 1.5<br>0.2 to ~1<br>~1<br>~1    | N/A                                                     |
| Overprediction               | Bloss et al., 2007                               | Jan–Feb 2005      | Halley               | Polar        | Mean (All)<br>Peak (Mean)                             | 0.39<br>0.79                              | 2.04<br>4.03                                           | Peak (S1: Conventional)<br>Peak (S2: S1 + halogen oxides)<br>Peak (S3: S2 + possible VOCs)       | 0.67<br>1.64<br>1.27           | N/A                             | N/A                                                     |
| Overprediction               | Holland et al., 2003                             | Jul–Aug 1998      | Pabsthum             | Rural        | Peaks (Range)                                         | 6 to 8                                    | 5 to 7.4                                               | Mean (Low NO <sub>x</sub> )                                                                      | 2                              | 1.4                             | N/A                                                     |
| Overprediction               | Whalley et al., 2018                             | Jul–Aug 2012      | Kensington           | Urban        | Mean (Noon; S-W air)<br>Mean (Noon; E, polluted air)  | ~2.2<br>~3                                | ~0.2<br>~0.5                                           | Mean (Air mass; South-westerly)<br>Mean (Air mass; Easterly, polluted)                           | 1.25<br>2                      | ~4<br>10                        | N/A                                                     |
| Overprediction               | Griffith et al., 2016                            | May–June 2010     | CalNexLA             | Urban        | Peaks (Range)<br>Peaks (Weekdays)<br>Peaks (Weekend)  | 1.5 to 9<br>~4<br>~5                      | 0.8* to 10*<br>~3*<br>~8*                              | Mean (Weekend)<br>Mean (Weekday)                                                                 | 1.43<br>1                      | 0.77*<br>0.33*                  | Volz-Thomas et al., 2003b, a                            |

2

3

2

1 Table S1. Continued

| Comparison results (OH only) | Reference                                  | Time                          | Location in Figure 1 | Site types      | Measurement notes                                                                                                        | OH conc. $10^6 \text{ cm}^{-3}$ | HO <sub>2</sub> conc. $10^8 \text{ cm}^{-3}$ | Ratio notes                                                                                  | OH R <sub>s/o</sub>          | HO <sub>2</sub> R <sub>s/o</sub> | Other references targeting the same site |
|------------------------------|--------------------------------------------|-------------------------------|----------------------|-----------------|--------------------------------------------------------------------------------------------------------------------------|---------------------------------|----------------------------------------------|----------------------------------------------------------------------------------------------|------------------------------|----------------------------------|------------------------------------------|
| Underprediction              | Hofzumahaus et al., 2009; Lu et al., 2012; | July 2006                     | BackGarden           | Rural           | Peaks (Mean)                                                                                                             | 15                              | 15                                           | Mean (Range, NO < 1 ppb)<br>Mean (Lu et al., 2012)                                           | 0.2 to 0.33<br>0.5           | N/A                              | N/A                                      |
| Underprediction              | Whalley et al., 2011                       | Apr–May 2008                  | DanumValley          | Rainforest      | Peaks (Mean)                                                                                                             | 2.5                             | 3                                            | w/C <sub>2</sub> H <sub>6</sub> recycling mechanism (Peeters et al., 2009)                   | ~0.63                        | ~0.5                             | Pugh et al., 2010                        |
| Underprediction              | Liao et al., 2011                          | May–June 2007<br>Jun–Jul 2008 | Summit               | Polar           | Mean (2007 spring)<br>Mean (2008 summer)                                                                                 | 3.0<br>4.1                      | 2.7*<br>4.2*                                 | 2007 spring w/o BrO & w BrO<br>2008 summer w/o BrO & w BrO                                   | 0.72<br>0.78<br>0.54<br>0.56 | 0.87<br>0.96                     | Sjostedt et al., 2007                    |
| Underprediction              | Wolfe et al., 2014                         | Aug 2010                      | Manitou              | Forest          | Peaks (Range)                                                                                                            | 3 to 10                         | 24.6 to 44.3                                 | Peak                                                                                         | ~0.625                       | 0.33                             | Kim et al., 2013                         |
| Underprediction              | Tan et al., 2019                           | Oct–Nov 2014                  | Heshan               | Suburban        | Peaks (Mean)                                                                                                             | 4.5                             | 3                                            | Budget analysis only                                                                         | N/A                          | 1                                | N/A                                      |
| Underprediction              | Griffith et al., 2013                      | Jul–Aug 2008<br>Jul–Aug 2009  | UMBS                 | Forest          | Peak (Mean, 2008)<br>Peak (Mean, 2009)                                                                                   | ~3.3<br>~1.6                    | ~7<br>~4.8                                   | Mean (2008)<br>Mean (2008 w/ISOP mechanisms)<br>Mean (2009)<br>Mean (2009 w/ISOP mechanisms) | ~0.4<br>~1.3<br>~0.6<br>~1.5 |                                  | N/A                                      |
| Underprediction              | Lu et al., 2013                            | Sept 2006                     | Yufa                 | Urban           | Peaks (Range)<br>Peaks (Mean)                                                                                            | 4 to 17<br>~7                   | 2 to 24<br>~1.5                              | Mean (NO < 0.1 ppb)<br>Mean (NO > 1 ppb)                                                     | 0.38<br>~1                   | ~1<br>~1                         | N/A                                      |
| Underprediction              | Mao et al., 2012                           | Jun–Jul 2009                  | BFRS                 | Forest          | Peaks (Mean w/ interference)<br>Peaks (Mean w/o interference)                                                            | ~4.5<br>~1.8                    | N/A                                          | Mean (w/ interference)<br>Mean (w/o interference)                                            | 0.32<br>0.71                 | N/A                              | N/A                                      |
| Underprediction              | Tan et al., 2017; Lu et al., 2019          | Summer 2014                   | Wangdu               | Rural           | Peaks (Range noontime)                                                                                                   | 5 to 15                         | 3 to 14                                      | Mean (NO > 0.3 ppb)<br>Mean (NO < 0.3 ppb, afternoon)                                        | ~1<br>0.5                    | 10 (NO > 4 ppb)<br>N/A           | N/A                                      |
| Underprediction              | Lew et al., 2020                           | Jul 2015                      | IURTP                | Forest          | Peaks (Mean)                                                                                                             | 4                               | 10                                           | Mean (Daytime)<br>Mean (Evening and morning)                                                 | 0.83<br>0.50                 | 1.10 to 1.32                     | N/A                                      |
| Underprediction              | Lelieveld et al., 2008                     | Oct 2005                      | AmazonSuriname       | Forest (Flight) | Mean (Forest boundary)<br>Mean (Forest free troposphere)<br>Mean (Atlantic boundary)<br>Mean (Atlantic free troposphere) | 5.6<br>8.2<br>9.0<br>10.1       | 10.5<br>4.9<br>6.7<br>5.5                    | Mean (w/MIM: Mainz ISOP mechanism)<br>Mean (w/MIM2+: extra 40% to 80% OH recycle)            | 0.1 to 0.2<br>~1             | N/A                              | N/A                                      |

2

3

1 Table S1. Continued

| Comparison results (OH only)                     | Reference                                 | Time                   | Location in Figure 1 | Site types | Measurement notes                                  | OH conc. $10^6 \text{ cm}^{-3}$ | HO <sub>2</sub> conc. $10^8 \text{ cm}^{-3}$ | Ratio notes                                  | OH R <sub>s/o</sub> | HO <sub>2</sub> R <sub>s/o</sub> | Other references targeting the same site      |
|--------------------------------------------------|-------------------------------------------|------------------------|----------------------|------------|----------------------------------------------------|---------------------------------|----------------------------------------------|----------------------------------------------|---------------------|----------------------------------|-----------------------------------------------|
| Well Matched                                     | Ren, 2003b, a                             | Jun–Aug 2001           | NewYork              | Urban      | Peaks (Range)<br>Peaks (Mean)                      | 2 to 20<br>7                    | 0.5 to 6<br>1                                | Mean                                         | 0.91                | 0.81                             | N/A                                           |
| Well Matched                                     | Ren et al., 2006                          | Jul–Aug 2002           | Whiteface            | Forest     | Peaks (Mean)                                       | 2.6                             | 4.9                                          | Mean                                         | 1.22                | 0.83                             | N/A                                           |
| Well Matched                                     | Kanaya et al., 2007b                      | Jan–Feb & Jul–Aug 2004 | Tokyo                | Urban      | Peaks (Mean, winter)<br>Peaks (Mean, summer)       | 1.5<br>6.3                      | 0.27<br>1.4                                  | Peaks (Mean, winter)<br>Peaks (Mean, summer) | 0.99<br>0.81        | 0.71<br>1.22                     | N/A                                           |
| Well Matched                                     | Feiner et al., 2016; Kaiser et al., 2016; | Jun–Jul 2013           | Alabama              | Forest     | Peaks (Mean)                                       | 1                               | 6.64                                         | Peaks (Mean)                                 | ~1                  | ~1                               | N/A                                           |
| Well Matched                                     | Jeong et al., 2022                        | Feb–Mar 2014           | AmazonBrazil         | Forest     | Peaks (Mean 10:00-15:00)<br>Peaks (Range)          | 1<br>~1 to ~2.8                 | N/A                                          | Mean                                         | 1                   | N/A                              | N/A                                           |
| Well Matched                                     | Hens et al., 2014                         | Summer 2010            | Hyytiälä             | Forest     | Mean (Above-Canopy)<br>Mean (Ground)               | 3.5<br>~1.8 to ~1.2             | N/A                                          | Mean                                         | 1                   | 0.3                              | Petäjä et al., 2009;<br>Novelli et al., 2014; |
| Well Matched                                     | Emmerson et al., 2007                     | Jul–Aug 2003           | WrittleCollege       | Urban      | Peaks (Range)                                      | 1.2 to 7.5                      | 0.16 to 3.3                                  | Mean                                         | 1.24                | 1.07                             | N/A                                           |
| Well Matched                                     | Ren et al., 2013                          | Apr–May 2009           | Houston              | Urban      | Peak (Mean)                                        | ~8.8                            | ~6.2                                         | Mean                                         | 0.9                 | 1.22                             | Mao et al., 2010;<br>Chen et al., 2010;       |
| Well Matched                                     | Ma et al., 2019                           | Nov–Dec 2017           | PKU                  | Urban      | Peaks (Mean clean)<br>Peaks (Mean polluted)        | 2<br>1.5                        | 0.4<br>0.3                                   | Mean (clean)<br>Mean (polluted)              | ~1<br>~0.66         | ~0.66<br>0.08                    | N/A                                           |
| Well Matched with missing source                 | Whalley et al., 2021                      | Summer 2017            | IAP                  | Urban      | Peak (All)                                         | 28                              | 10                                           | Mean (NO < 1 ppb)                            | ~1                  | 1.83                             | Slater et al., 2020                           |
| Well Matched with underpredicted HO <sub>2</sub> | Zhang et al., 2022b                       | Nov–Dec 2019           | Shanghai             | Urban      | Peaks (Mean)                                       | 2.7                             | 0.8                                          | N/A                                          | N/A                 | N/A                              | N/A                                           |
| No comparison                                    | Kukui et al., 2008                        | June–July 2007         | Grignon              | Suburban   | Peak (July 6)                                      | ~23                             | ~2                                           | N/A                                          | N/A                 | N/A                              | N/A                                           |
| No comparison                                    | Wang et al., 2021                         | Oct–Nov 2018           | PKUSZ                | Suburban   | Peaks (Mean)                                       | 5.3                             | 4.2                                          | N/A                                          | N/A                 | N/A                              | Wang et al., 2019                             |
| No comparison                                    | Rohrer and Berresheim, 2006               | 1999–2003              | MOHp                 | Rural      | Mean (All)                                         | 1.97                            | N/A                                          | N/A                                          | N/A                 | N/A                              | Handisides, 2003;<br>Novelli et al., 2014;    |
| No comparison                                    | Zhang et al., 2022a                       | Aug–Sept 2019          | Chengdu              | Urban      | Peaks (Range, PKU-LIF)<br>Peaks (Range, AIOFM-LIF) | 1.6 to 15<br>2.1 to 15.9        | N/A                                          | N/A                                          | N/A                 | N/A                              | N/A                                           |

2

3

4

|    |                |                                                                                                                     |
|----|----------------|---------------------------------------------------------------------------------------------------------------------|
| 1  | <b>Notes:</b>  |                                                                                                                     |
| 2  | ISOP:          | Isoprene.                                                                                                           |
| 3  | AIOFM:         | Laser-induced fluorescence instrument by the Anhui Institute of Optics Fine Mechanics, Chinese Academy of Sciences. |
| 4  | Mean:          | Campaign average concentration or ratio.                                                                            |
| 5  | Peak:          | Campaign maximum concentration or ratio.                                                                            |
| 6  | Peaks (Mean):  | Maximum concentration or ratio for the averaged diurnal or averaged cases.                                          |
| 7  | Mean (Range):  | Daily average concentration or ratio range for the campaign or cases.                                               |
| 8  | Peaks (Range): | Maximum concentration or ratio range for the campaign or cases                                                      |
| 9  | w/ and w/o:    | Considered or did not consider the specific mechanism, species, or interference.                                    |
| 10 | ~:             | The result is based on the figure or description, and the exact number is not mentioned in the article.             |
| 11 | N/A:           | Not available in the article                                                                                        |
| 12 | *:             | The HO <sub>2</sub> result includes some RO <sub>2</sub> species.                                                   |

## 1 Calibration

2 The calibration was performed by applying the calibrator shown in Figure 2 to the CIMS. The  
3 calibration flow passes through the water bubbler and carries H<sub>2</sub>O. When the humid calibration  
4 flow is exposed to the Pen Ray mercury lamp (Analytik Jena, UVP Pen Ray), the OH radicals  
5 produced by H<sub>2</sub>O photolysis as shown below:

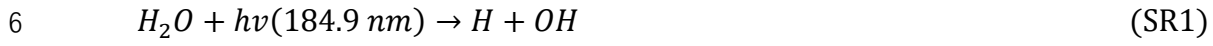

7 The OH concentration ([OH]) produced by the calibrator is calculated by SE1.

$$8 \quad [OH] = [H_2O] * \sigma_{H_2O} * \Phi * It \quad (\text{SE1})$$

9 [H<sub>2</sub>O] is the water concentration in the calibration flow which is calculated from the  
10 temperature, saturated water vapor pressure, and relative humidity.  $\sigma_{H_2O}$  ( $= 7.14 \times 10^{-20} \text{ cm}^2$ ;  
11 (Cantrell et al., 1997) is the photolysis cross-section of water vapor, while  $\Phi$  represents the  
12 photolysis quantum yield and was assumed to be 1 (Kürten et al., 2012). The photon flux (*It*)  
13 was determined using the chemical actinometry method. This method measures the mixing  
14 ratio of N<sub>2</sub>O and its photolysis products to determine the product *It* value of the lamp in the  
15 calibrator while the N<sub>2</sub>O photolysis and H<sub>2</sub>O photolysis require the same photon intensity  
16 (184.9 nm). The reactions and equations of *It* determination were presented by (Kürten et al.,  
17 2012). In this study, the *It* values were measured before and after the field campaign and no  
18 significant difference was found.

19 By calculating the [OH]<sub>CAL</sub> produced by the calibrator, the signal response to OH (*TS*<sub>97</sub> - *BS*<sub>97</sub>),  
20 and reagent ion (*S*<sub>62</sub>), the calibration factor (*C*) can be calculated by following the equation  
21 which was transformed from E1.

$$22 \quad C = \frac{1}{[OH]_{CAL}} \times \frac{TS_{97} - BS_{97}}{S_{62}} \quad (\text{SE2})$$

23

## 24 Detection limit

25 The detection limit can be calculated as follows,

$$26 \quad DL = \frac{1}{C} \times n * \sigma \left( \frac{BS_{97}}{S_{62}} \right) \quad (\text{SE3})$$

27 Where DL is the detection limit in cm<sup>-3</sup>, *C* is the calibration factor, and *n* is the ratio of signal  
28 to noise S/N.  $\sigma \left( \frac{BS_{97}}{S_{62}} \right)$  represents the standard deviation of the background measurement when

1 the scavenger was added through front injectors. The detection limit (S/N = 3, average time =  
2 6 minutes) in the laboratory was approximately  $1.7 \times 10^5$  molecule  $\text{cm}^{-3}$  on average.

3

#### 4 **Uncertainty calculation**

5 The uncertainty of the instrument is calculated by the rules for propagation for the uncertainty.

6 Propagation Rules for Addition ( $y = x_1 + x_2$ ):  $e_y = \sqrt{e_{x_1}^2 + e_{x_2}^2}$  (SE4)

7 Propagation Rules for Multiplication ( $y = x_1 \times x_2$ ):  $\frac{e_y}{y} = \sqrt{\left(\frac{e_{x_1}}{x_1}\right)^2 + \left(\frac{e_{x_2}}{x_2}\right)^2}$  (SE5)

8 Where  $e_y$ ,  $e_{x_1}$ ,  $e_{x_2}$ , are the absolute uncertainty for  $y$ ,  $x_1$ , and  $x_2$ .

9

#### 10 **Calibration Uncertainties**

11 The calibration uncertainty is calculated by the uncertainties of all the parameters involved in  
12 the SE2 which includes the uncertainty of calculated OH radicals concentration and the  
13 precision of the measurements of signal at 62 m/z and 97 m/z. Due to the equation SE1, the  
14 uncertainty of OH radical ( $[OH]_{CAL}$ ) will further be contributed by the uncertainty of  $It$  ~36%,  
15  $\sigma_{\text{H}_2\text{O}}$  (~5%),  $\phi_{\text{H}_2\text{O}}$  (<1%, Cantrell et al. 1997), and calculated water concentration based on the  
16 measured Temperature and relative humidity (~10%). The precision of the measurements  
17 signal at 62 m/z and 97 m/z ( $\frac{TS_{97} - BS_{97}}{S_{62}}$ ) of the CIMS instrument ( $2\sigma$ ) was 11% (for 6 min  
18 integration time). Considering all the above uncertainties and calculated by the rules (SE3 and  
19 SE4), the overall uncertainty for the calibration factor can be calculated by the well-known  
20 uncertainty formula. The uncertainty for the calibration factor was about 38% in this study.

21

#### 22 **Sensitivity optimization**

23 The calibration factor (C) of the CIMS instrument to the OH radicals depends on the conversion  
24 efficiency of OH to  $\text{H}_2\text{SO}_4$  in the chemical conversion region ( $E_{\text{Conv}}$ ), the ionization efficiency  
25 of  $\text{H}_2\text{SO}_4$  to  $\text{HSO}_4^-$  in chemical ionization region ( $E_{\text{Ion}}$ ), and the ion-transmitted efficiency of  
26  $\text{HSO}_4^-$  from sample inlet to mass spectrometer system ( $E_{\text{Trans}}$ ):

$$27 \quad C \sim E_{\text{Conv}} \cdot E_{\text{Ion}} \cdot E_{\text{Trans}}$$

28  $E_{\text{Conv}}$  is dependent on the reaction time and the  $\text{SO}_2$  concentration of the conversion reactions



1 (R1-3). However, the conversion time has to be relatively short ( $<1$ s) to avoid the interference  
2 of HO<sub>2</sub> recycling as mentioned by Berresheim et al. (2000). E<sub>Ion</sub> is affected by the flow  
3 dynamics, which determines the mixing of flows, and the electric field inside the ionization  
4 region, which forces the NO<sub>3</sub><sup>-</sup> · (HNO<sub>3</sub>)<sub>m</sub> · (HO<sub>2</sub>)<sub>n</sub> primary ions to the center of the region for  
5 H<sub>2</sub>SO<sub>4</sub> ionization. E<sub>Trans</sub> is related to the N<sub>2</sub> buffer and induces an electric field in the pinhole  
6 area. On the other hand, E<sub>Trans</sub> is proportional to the transmission of the neutral molecule and  
7 particles from sampling air to the mass spectrometer system which deteriorates the  
8 measurement and damages the mass spectrometer. Thus, the optimization should take both  
9 transmission efficiency and protection function into consideration.

10 In this study, the CIMS was optimized before the field campaign. The detailed specification  
11 was shown in Table S1. To maximize the E<sub>Conv</sub>, 5 sccm SO<sub>2</sub> was added from the front injectors  
12 to the sample flow and the [SO<sub>2</sub>] was around 12 ppm in the sample flow. The sample flow was  
13 3727 sccm and the sample flow rate was 55 cm/s which means the reaction time for OH  
14 conversion is around 47 ms.

15 The reaction time affects the positive bias of OH arising from HO<sub>2</sub> + NO in the inlet. To  
16 estimate this bias, Tanner et al., (1997) calculated the OH produced by the HO<sub>2</sub> recycling  
17 reaction under different NO conditions (from  $< 60$  ppt to 1-2 ppb) in the inlet by a box model.  
18 Their results showed that the positive bias of less than  $0.5 \times 10^6$  cm<sup>-3</sup> with a 60 ms conversion  
19 time, and the bias does not increase with the increase of NO concentration. Thus, the conversion  
20 time of 47 ms in our study should further reduce such positive bias.

21 We tested both C<sub>3</sub>F<sub>6</sub> and C<sub>3</sub>H<sub>8</sub> as scavenger gas for OH. We found that the C<sub>3</sub>H<sub>8</sub> provided by  
22 our suppliers were questionable because the scavenging efficiency ( $SE = \frac{TS97-BS97}{TS97} \times 100\%$ )  
23 by C<sub>3</sub>H<sub>8</sub> in the different cylinders and different suppliers varied from 30% to 98% although the  
24 cylinders were labelled with the same concentration. In contrast, C<sub>3</sub>F<sub>6</sub> from different cylinders  
25 labelled with the same concentration gave consistent SE. Therefore, we chose C<sub>3</sub>F<sub>6</sub> as the OH  
26 scavenger gas.

27 These parameters taking the E<sub>Conv</sub> and the HO<sub>2</sub> interference mentioned above into  
28 consideration. Similarly, the sample/sheath flow ratio was adjusted to 0.3 and the voltages  
29 different between sample and sheath flow were adjusted to 48 V to achieve the maximum E<sub>Ion</sub>.

- 1 Finally, the buffer flow was 440 sccm and the Pinhole voltage difference was 30 V for a better
- 2  $E_{\text{Trans}}$  and to prevent neutral molecules enter the mass spectrometer system at the same time.
- 3 Table S2. Technical details and specifications of the OH-CIMS

| Efficiency Related     | Parameters                         | Gas                                   | Values               | Units                  | Specification for Measurement                                   | Values                   | Units           |
|------------------------|------------------------------------|---------------------------------------|----------------------|------------------------|-----------------------------------------------------------------|--------------------------|-----------------|
| $E_{\text{Conv}}$      | <b>Front Injection</b>             | SO <sub>2</sub> (0.9%)                | 5                    | sccm                   | Sample Flow [SO <sub>2</sub> ]                                  | 12                       | ppm             |
|                        | <b>Pulse Valve</b>                 | N <sub>2</sub>                        | 2                    | sccm                   | Cycle Duration (OH)                                             | 6                        | mins            |
|                        |                                    | C <sub>3</sub> F <sub>6</sub> (99.9%) | 2                    | sccm                   | Scavenging Efficiency (OH)                                      | 92%                      |                 |
|                        | <b>Rear Injection</b>              | C <sub>3</sub> F <sub>6</sub> (99.9%) | 2                    | sccm                   | Sample Flow [C <sub>3</sub> F <sub>6</sub> ]                    | 1072                     | ppm             |
|                        |                                    | HNO <sub>3</sub>                      | 10                   | sccm                   | Reaction Time                                                   | 47                       | ms              |
|                        | <b>Sample Flow</b>                 |                                       | 3.7                  | slpm                   | Sample Flow Speed                                               | 55                       | cm/s            |
| $E_{\text{Ion}}$       | <b>Sheath Flow</b>                 | Zero Air                              | 12.6                 | slpm                   | Reynolds Number in Ionization Chamber                           | >4000<br>Turbulent flows |                 |
|                        |                                    | HNO <sub>3</sub>                      | 10                   | sccm                   |                                                                 |                          |                 |
|                        |                                    | C <sub>3</sub> F <sub>6</sub> (99.9%) | 2                    | sccm                   | Sheath Flow [C <sub>3</sub> F <sub>6</sub> ]                    | 159                      | ppm             |
|                        | <b>Total Flow</b>                  |                                       | 16.8                 | slpm                   | Sheath Flow Speed                                               | 25                       | cm/s            |
|                        | <b>Sheath Voltages</b>             |                                       | -80                  | V                      | Voltages Difference for ionization                              | 48                       | V               |
| <b>Sample Voltages</b> |                                    | -32                                   | V                    |                        |                                                                 |                          |                 |
| $E_{\text{Trans}}$     | <b>Buffer Gas</b>                  | N <sub>2</sub>                        | 440                  | sccm                   | Voltages Difference for transmission                            | 80                       | V               |
|                        | <b>Buffer Voltages</b>             |                                       | -70                  | V                      |                                                                 |                          |                 |
|                        | <b>Pinhole Voltages</b>            |                                       | -40                  | V                      |                                                                 |                          |                 |
| <b>Cal</b>             | <b>Calibration Flow</b>            |                                       | 10                   | slpm                   | Calibration Factor (Reagent ion: NO <sub>3</sub> <sup>-</sup> ) | 1.21*10 <sup>-8</sup>    | cm <sup>3</sup> |
|                        | <b>Flow Speed</b>                  |                                       | 65                   | cm/s                   |                                                                 |                          |                 |
|                        | <b>Product It Value</b>            |                                       | 8.8*10 <sup>10</sup> | photon/cm <sup>2</sup> |                                                                 |                          |                 |
| <b>Uncertainties</b>   | <b>Sigma (<math>\sigma</math>)</b> |                                       | 2                    |                        | <b>Detection Limit (10<sup>5</sup> × cm<sup>-3</sup>)</b>       | In the lab (3 $\sigma$ ) | 1.7             |
|                        | <b>Calibration</b>                 |                                       | 38%                  |                        |                                                                 | Daytime (3 $\sigma$ )    | 12              |
|                        | <b>Overall</b>                     |                                       | 44%                  |                        |                                                                 | Nighttime (3 $\sigma$ )  | 8.5             |

- 4 Notes:
- 5 sccm – Standard cubic centimeters per minute. Slpm – Standard liter per minute.
- 6 Ppm – Parts per million V – Voltage
- 7 The zero air was produced by Model 111 Zero Air Supply (Thermo Fisher Scientific) with an
- 8 air compressor.
- 9 Suppliers for N<sub>2</sub>, SO<sub>2</sub>, and C<sub>3</sub>F<sub>6</sub>: Scientific Gas Engineering Co. Ltd., HK.
- 10
- 11
- 12
- 13

# 1 OH reactivity calculation

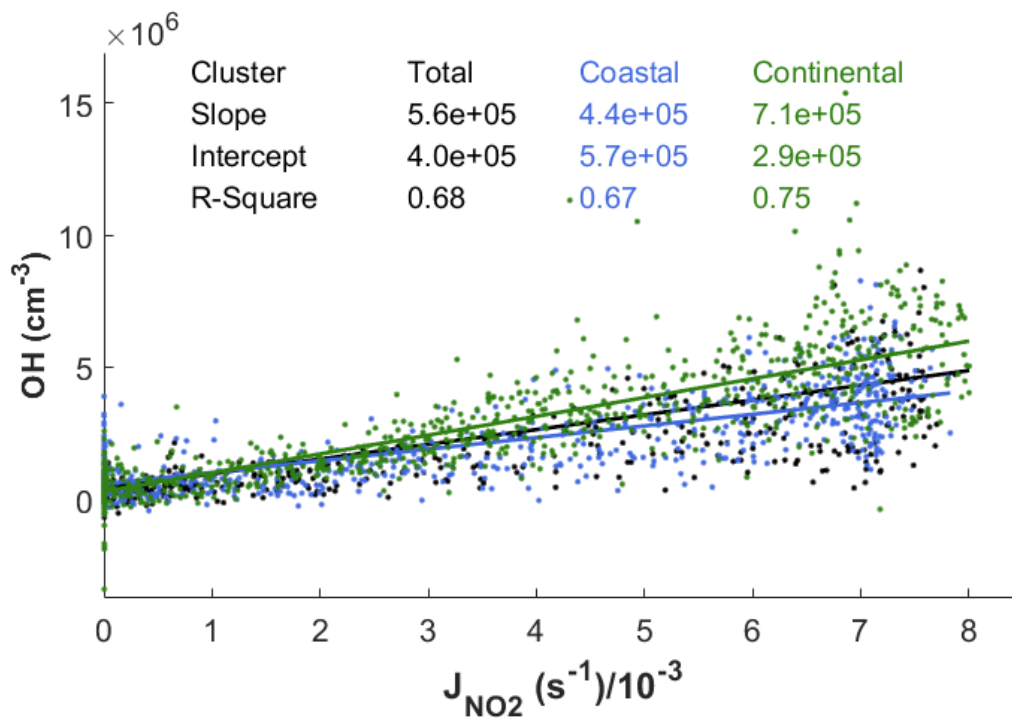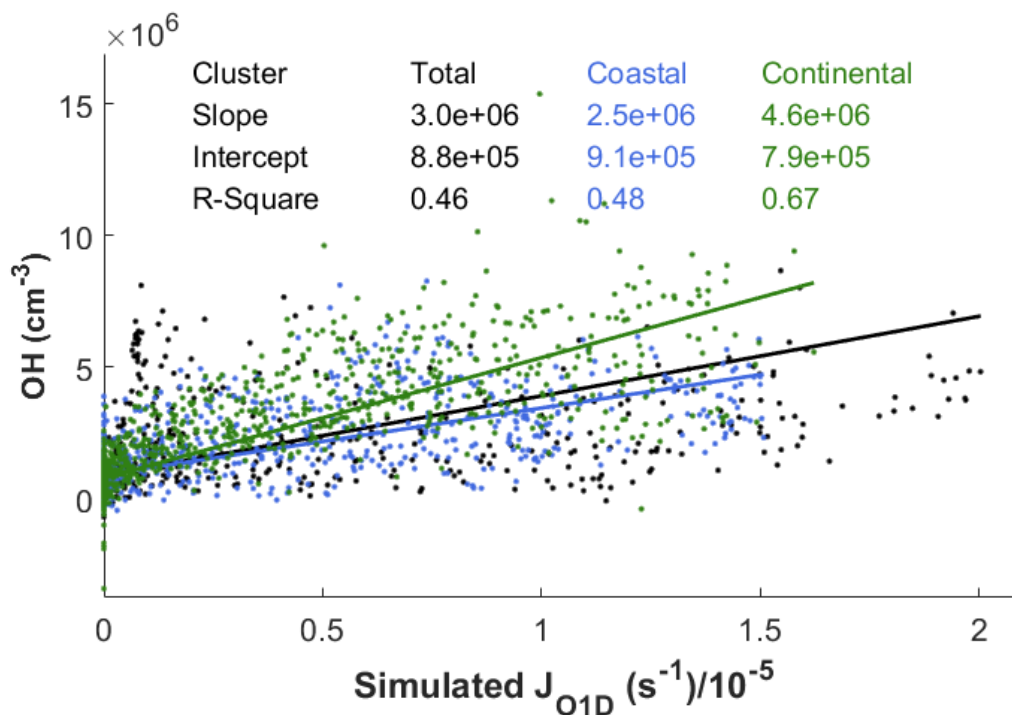

2

3 Figure S2. Correlation between observed OH concentration and a) photolysis frequency of  $\text{NO}_2$   
 4 ( $J_{\text{NO}_2}$ ), and b) model simulated photolysis frequency  $\text{O}_3$  (Simulated  $J_{\text{O1D}}$ ). The linear  
 5 regressions with respect to total, coastal, and continental cases are labelled in black, blue, and

1 green. Note that the coastal and continental cases are reported as correlations for all cases in  
2 different clusters, not only the selected cases in the Figures 6 and 8 comparisons.  
3 Table S3. Average concentration with the standard deviations of measured species with respect  
4 to different cases.

| Species Abb.                                                   | Species Name                                  | Total      | Coastal    | Continental | Oct10M     | Oct10A     | Episode    |
|----------------------------------------------------------------|-----------------------------------------------|------------|------------|-------------|------------|------------|------------|
| OH 10 <sup>6</sup><br>(cm <sup>-3</sup> )                      | Hydroxyl radical                              | 2.4±1.9    | 2.5±1.4    | 3.1±1.7     | 3.7±2.1    | 1.8±1.5    | 4.2±2.8    |
| OH_DL 10 <sup>6</sup><br>(cm <sup>-3</sup> )                   | The detection<br>limit of hydroxyl<br>radical | 1.0±0.5    | 0.8±0.3    | 0.9±0.3     | 1.2±0.5    | 1.5±0.7    | 1.0±0.5    |
| OH_Err 10 <sup>6</sup><br>(cm <sup>-3</sup> )                  | OH<br>Measurement<br>Uncertainty              | 1.5±1.0    | 1.8±0.5    | 1.7±0.6     | 0.9±0.8    | 1.0±0.9    | 2.5±1.7    |
| PM_Num 10 <sup>3</sup><br>(#/cm <sup>3</sup> )                 | Number of<br>particulate<br>matters           | 3.8±1.9    | 4.1±1.7    | 4.9±1.4     | NaN        | NaN        | 5.6±2.0    |
| *PM_Sur 10 <sup>7</sup><br>(nm <sup>2</sup> /cm <sup>3</sup> ) | The surface of<br>particulate<br>matters      | 19.7±9.0   | 15.0±2.3   | 26.8±4.3    | NaN        | NaN        | 31.5±14.2  |
| PM_Vol 10 <sup>9</sup><br>(nm <sup>3</sup> /cm <sup>3</sup> )  | Volume of<br>particulate<br>matters           | 7.6±3.8    | 4.9±0.7    | 10.5±1.5    | NaN        | NaN        | 12.0±5.9   |
| *RH (%)                                                        | Relative<br>humidity                          | 70.1±10.1  | 69.9±4.5   | 64.2±2.8    | 69.3±4.6   | 63.7±3.7   | 61.6±9.6   |
| *CO2 (ppm)                                                     | Carbon dioxide                                | 426.7±14.8 | 412.8±1.2  | 426.3±2.4   | 424.1±2.8  | 425.2±2.5  | 428.0±10.8 |
| WindDi (°)                                                     | Wind direction                                | 45.9±35.7  | 49.3±0.9   | 53.3±24.0   | 30.7±5.5   | 48.5±3.3   | 125.7±90.1 |
| WindSp (m/s)                                                   | Wind speed                                    | 4.3±1.6    | 5.2±0.9    | 3.9±0.6     | 4.0±0.5    | 3.0±0.5    | 2.4±1.5    |
| *Temp (°C)                                                     | Temperature                                   | 23.3±3.5   | 24.7±0.9   | 25.5±1.4    | 25.3±1.6   | 27.4±0.9   | 26.7±2.1   |
| †SO2                                                           | Sulfur dioxide                                | 2.6±1.2    | 3.2±0.2    | 3.4±0.1     | 3.5±0.2    | 3.2±0.1    | 4.4±0.8    |
| †CO                                                            | Carbon<br>monoxide                            | 304.9±72   | 217.4±10.9 | 318.0±8.5   | 291.3±16.3 | 258.4±14.1 | 329.0±74.6 |
| NH3                                                            | Ammonia                                       | 8.8±1.8    | 8.9±0.4    | 9.5±0.6     | 9.7±0.2    | 9.2±0.6    | 10.6±3.0   |
| †NO                                                            | Nitrogen<br>Monoxide                          | 0.9±1.4    | 0.3±0.1    | 0.7±0.4     | 0.6±0.3    | 0.3±0.1    | 1.4±1.3    |
| †NO2                                                           | Nitrogen<br>Dioxide                           | 3.9±3.5    | 1.6±0.7    | 4.5±1.1     | 3.4±1.4    | 1.1±0.5    | 10.1±5.6   |
| †NOx                                                           | Nitrogen<br>Oxides                            | 4.8±4.4    | 1.9±0.7    | 5.2±1.2     | 4.0±1.6    | 1.4±0.5    | 11.4±6.2   |
| †O3                                                            | Ozone                                         | 49.9±20.6  | 59.5±10.1  | 54.7±14.5   | 44.2±9.9   | 61.2±3.8   | 70.4±33.5  |
| †JNO2 10 <sup>-3</sup><br>(s <sup>-1</sup> )                   | The photolysis<br>rate constant of<br>NO2     | 3.6±2.5    | 4.7±2.4    | 4.0±2.0     | 4.8±2.5    | 5.0±2.6    | 4.3±2.2    |

|           |                                 |            |            |            |            |            |           |
|-----------|---------------------------------|------------|------------|------------|------------|------------|-----------|
| † HONO    | Nitrous acid                    | 0.15±0.069 | 0.15±0.019 | 0.16±0.035 | 0.29±0.101 | 0.14±0.015 | NaN       |
| *C2H4     | Ethene                          | 1.4±1.3    | 0.5±0.1    | 0.7±0.1    | 0.6±0.1    | 0.3±0.1    | 0.9±0.2   |
| *C2H6     | Ethane                          | 1.9±0.9    | 1.4±0.1    | 2.1±0.1    | 2.0±0.1    | 1.7±0.1    | 2.3±0.5   |
| *C3H8     | Propane                         | 1.7±0.9    | 1.1±0.2    | 1.5±0.2    | 1.3±0.1    | 0.8±0.1    | 2.1±1.7   |
| *C3H6     | Propene                         | 0.10±0.05  | 0.07±0.01  | 0.11±0.02  | 0.18±0.06  | 0.06±0.01  | 0.12±0.04 |
| *C2H2     | Ethyne                          | 1.63±0.65  | 0.97±0.03  | 1.42±0.23  | 1.07±0.08  | NaN        | 1.39±0.48 |
| *IC4H10   | i-Butane                        | 0.55±0.44  | 0.22±0.04  | 0.61±0.14  | 0.44±0.09  | 0.23±0.07  | 1.02±1.04 |
| *NC4H10   | n-Butane                        | 0.76±0.60  | 0.27±0.06  | 0.88±0.19  | 0.67±0.13  | 0.32±0.08  | 1.53±1.62 |
| *TBUT2ENE | But-2-ene                       | 0.06±0.01  | 0.05±0.00  | 0.06±0.00  | 0.05±0.00  | NaN        | 0.06±0.01 |
| *BUT1ENE  | But-1-ene                       | 0.08±0.03  | NaN        | 0.10±0.01  | 0.08±0.01  | NaN        | NaN       |
| *IC5H12   | i-Pentane                       | 0.40±0.22  | 0.18±0.04  | 0.42±0.05  | 0.46±0.03  | 0.28±0.11  | 0.60±0.36 |
| *NC5H12   | n-Pentane                       | 0.24±0.12  | 0.13±0.02  | 0.24±0.02  | 0.33±0.05  | 0.17±0.04  | 0.29±0.21 |
| *C4H6     | Buta-1,3-diene                  | 0.06±0.01  | NaN        | 0.06±0.00  | NaN        | NaN        | 0.06±0.00 |
| *M2PE     | 2-Methyl pentane                | 0.31±0.14  | NaN        | 0.28±0.05  | 0.30±0.04  | 0.20±0.00  | 0.36±0.27 |
| *NC6H14   | n-Hexane                        | 0.15±0.11  | 0.08±0.01  | 0.15±0.04  | 0.10±0.03  | 0.05±0.00  | 0.28±0.28 |
| *IC8H18   | i-Octane                        | 0.02±0.02  | NaN        | 0.02±0.01  | NaN        | NaN        | 0.05±0.06 |
| *NC7H16   | n-Heptane                       | 0.03±0.01  | NaN        | 0.07±0.00  | NaN        | NaN        | 0.07±0.00 |
| *NC8H18   | n-Octane                        | 0.03±0.00  | NaN        | 0.03±0.00  | NaN        | NaN        | 0.03±0.00 |
| *EBENZ    | Ethyl Benzene                   | 0.05±0.04  | 0.02±0.01  | 0.05±0.01  | 0.05±0.02  | 0.01±0.00  | 0.08±0.09 |
| *MXYL     | m-Xylene                        | 0.03±0.03  | 0.01±0.00  | 0.03±0.01  | 0.03±0.01  | 0.01±0.00  | 0.02±0.02 |
| *OXYL     | o-Xylene                        | 0.04±0.03  | 0.01±0.00  | 0.03±0.01  | 0.03±0.01  | 0.01±0.00  | 0.03±0.03 |
| **CH2O2   | Formic acid                     | 1.02±0.44  | 0.58±0.08  | 1.03±0.19  | 1.16±0.20  | 1.55±0.11  | 1.54±0.47 |
| **C2H4O2  | Acetic acid                     | 2.76±1.46  | 1.59±0.34  | 3.03±0.68  | 4.54±0.35  | 3.19±0.61  | 4.38±3.25 |
| **C2H8O2  | Ethylene dihydrate              | 0.06±0.02  | 0.06±0.00  | 0.06±0.01  | 0.05±0.00  | 0.04±0.00  | 0.09±0.06 |
| **C5H8    | Isoprene                        | 0.31±0.24  | 0.16±0.06  | 0.36±0.14  | 0.69±0.46  | 0.56±0.33  | 0.54±0.25 |
| **C4H6O   | Methyl Vinyl Ketone+            | 0.16±0.10  | 0.06±0.01  | 0.22±0.06  | 0.26±0.05  | 0.15±0.06  | 0.32±0.19 |
| **C3H4O2  | Methacrolein Acrylic acid       | 0.12±0.05  | 0.06±0.01  | 0.13±0.03  | 0.16±0.02  | 0.13±0.02  | 0.19±0.10 |
| **C3H6O2  | Propanoic acid/ Hydroxy acetone | 0.90±0.43  | 0.57±0.15  | 0.97±0.23  | 1.26±0.03  | 1.01±0.11  | 1.45±0.93 |
| **C6H6    | Benzene                         | 0.28±0.13  | 0.12±0.03  | 0.33±0.03  | 0.43±0.04  | 0.25±0.05  | 0.38±0.21 |
| **C6H12   | Cyclohexane                     | 0.02±0.01  | 0.01±0.00  | 0.03±0.00  | 0.03±0.01  | 0.02±0.01  | 0.04±0.03 |
| **C3H4O3  | Pyruvic acid                    | 0.05±0.02  | 0.03±0.00  | 0.05±0.01  | 0.07±0.01  | 0.07±0.00  | 0.06±0.03 |
| **C7H8    | Toluene                         | 0.38±0.27  | 0.20±0.10  | 0.46±0.11  | 0.50±0.08  | 0.24±0.04  | 0.69±0.67 |
| **C8H10   | Xylene                          | 0.25±0.22  | 0.09±0.08  | 0.35±0.07  | 0.49±0.17  | 0.07±0.05  | 0.41±0.34 |
| **C10H16  | Monoterpene                     | 0.05±0.03  | 0.03±0.00  | 0.06±0.01  | 0.10±0.06  | 0.09±0.04  | 0.07±0.03 |
| **CH2O    | Formaldehyde                    | 1.03±0.41  | 0.62±0.05  | 1.17±0.11  | 1.72±0.10  | 1.59±0.17  | 1.17±0.42 |
| **C2H4O   | Acetaldehyde                    | 1.88±0.90  | 0.98±0.13  | 2.10±0.41  | 2.74±0.16  | 1.96±0.36  | 3.17±1.98 |
| **C3H6O   | Acetone                         | 3.88±1.60  | 2.18±0.31  | 4.43±0.74  | 5.64±0.49  | 5.91±0.47  | 5.92±2.85 |
| **C3H4O   | Acrolein                        | 0.25±0.11  | 0.14±0.02  | 0.29±0.05  | 0.39±0.04  | 0.33±0.05  | 0.39±0.19 |

|           |                        |           |           |           |           |           |           |
|-----------|------------------------|-----------|-----------|-----------|-----------|-----------|-----------|
| **C4H8O   | MEK +<br>Butanals      | 0.45±0.30 | 0.24±0.04 | 0.53±0.16 | 0.59±0.05 | 0.44±0.05 | 0.87±0.86 |
| **C8H8O   | Methyl<br>benzaldehyde | 0.04±0.03 | 0.02±0.00 | 0.05±0.01 | 0.06±0.00 | 0.04±0.01 | 0.08±0.06 |
| &BVOC     | Biogenic VOCs          | 0.3±0.4   | 0.2±0.1   | 0.4±0.1   | 1.1±0.6   | 0.8±0.4   | 0.7±0.5   |
| &AVOC     | Anthropogenic<br>VOCs  | 7.1±3.6   | 4.0±0.7   | 7.6±0.9   | 7.7±0.9   | 4.4±0.7   | 11.1±8.7  |
| &OVOC     | Oxygenated<br>VOCs     | 7.2±7.4   | 7.0±1.0   | 9.2±1.5   | 18.6±1.3  | 16.4±1.9  | 14.9±12.8 |
| &Arom     | Aromatic<br>compounds  | 0.6±0.6   | 0.4±0.2   | 0.8±0.1   | 1.5±0.3   | 0.6±0.1   | 1.2±1.3   |
| &Alkane   | Alkane                 | 6.5±3.4   | 3.6±0.5   | 6.8±0.8   | 6.3±0.6   | 3.8±0.6   | 9.9±7.5   |
| &Alkene   | Alkene                 | 2.5±1.9   | 0.5±0.1   | 2.2±0.2   | 2.6±0.2   | 1.0±0.5   | 2.5±1.0   |
| &Aldehyde | Aldehyde               | 4.4±4.5   | 4.2±0.5   | 5.7±0.8   | 11.4±0.8  | 10.4±1.1  | 9.1±7.6   |
| &Acid     | Acid                   | 2.8±2.9   | 2.8±0.5   | 3.4±0.6   | 7.2±0.5   | 5.9±0.8   | 5.8±5.2   |

1 Notes:

2 The concentration was averaged from the daytime (6:00 to 18:00) results.

3 The concentration unit is presented in the bracket in the 'Species Abb.'.

4 The unit for other species is in ppb.

5 \* Species measured by GC-MS and constrained by the model

6 \*\* Species measured by PTR-MS and constrained by the model.

7 † Species measured by instrument specified in Table 1.

8 & Different VOCs functional groups.

9

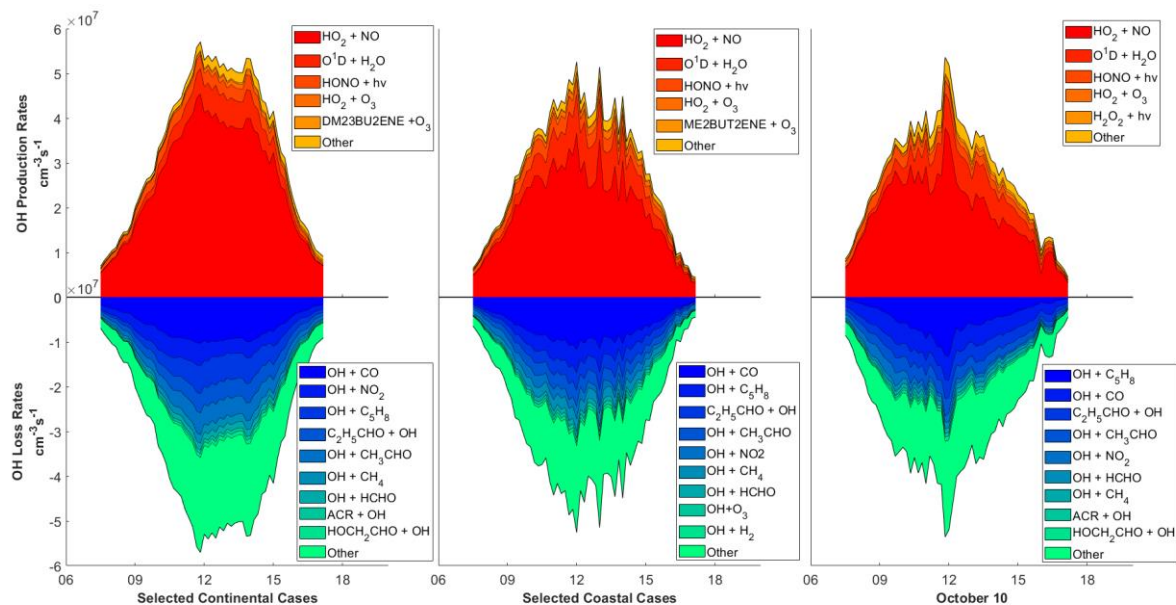

1  
 2 Figure S3. OH radical budgets for the continental cases, coastal cases, and 10 October. Where  
 3 DM23BU2ENE and ME2BUT2ENE represent 2,3-Dimethyl-2-butene and 2-Methyl-2-butene  
 4 respectively.

5

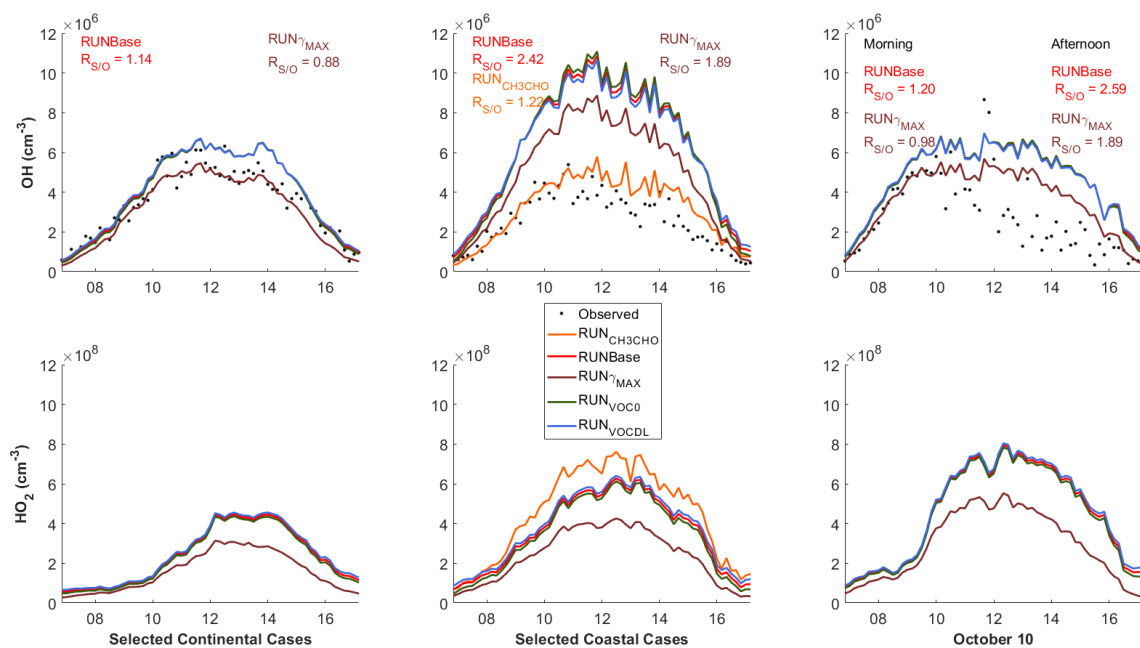

6  
 7 Figure S4. Sensitivity tests for the simulated OH and HO<sub>2</sub> in continental and coastal cases and  
 8 on 10 October. RUN<sub>CH3CHO</sub> shows the simulated results of the selected coastal cases when  
 9 additional CH<sub>3</sub>CHO is added as OH sinks. RUN<sub>γMAX</sub> shows the simulated results for the

1 maximum heterogeneous uptake effect of HO<sub>2</sub> ( $\gamma = 1$ ). The RUN<sub>VOC0</sub> and RUN<sub>VOCDL</sub> show the  
 2 simulated results that constraints “0” and the detection limit value as the concentration of VOCs  
 3 when their concentration was below detection limits.

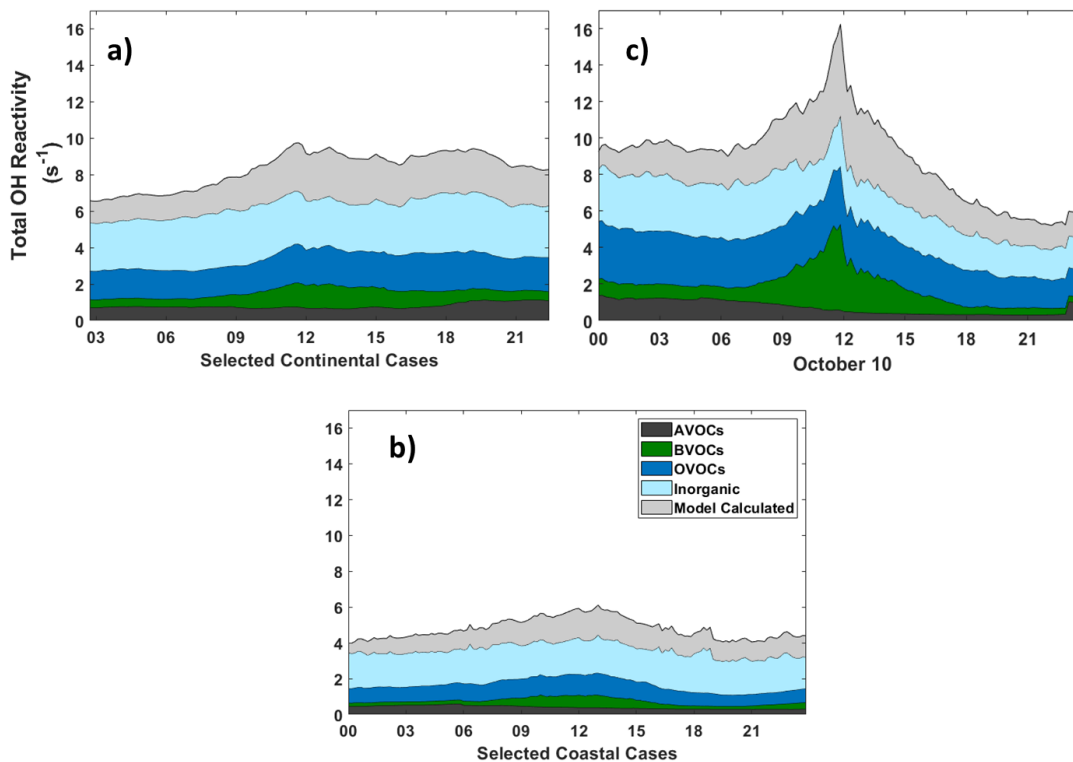

4  
 5 Figure S5. Simulated reactivity for continental cases (a), coastal cases (b), and 10 October (c).  
 6 The AVOCs, BVOCs, OVOCs, and Inorganic demonstrate the reactivity calculated from the  
 7 measured species and the Model Calculated represents the reactivity calculated by the derived  
 8 species simulated by the model.

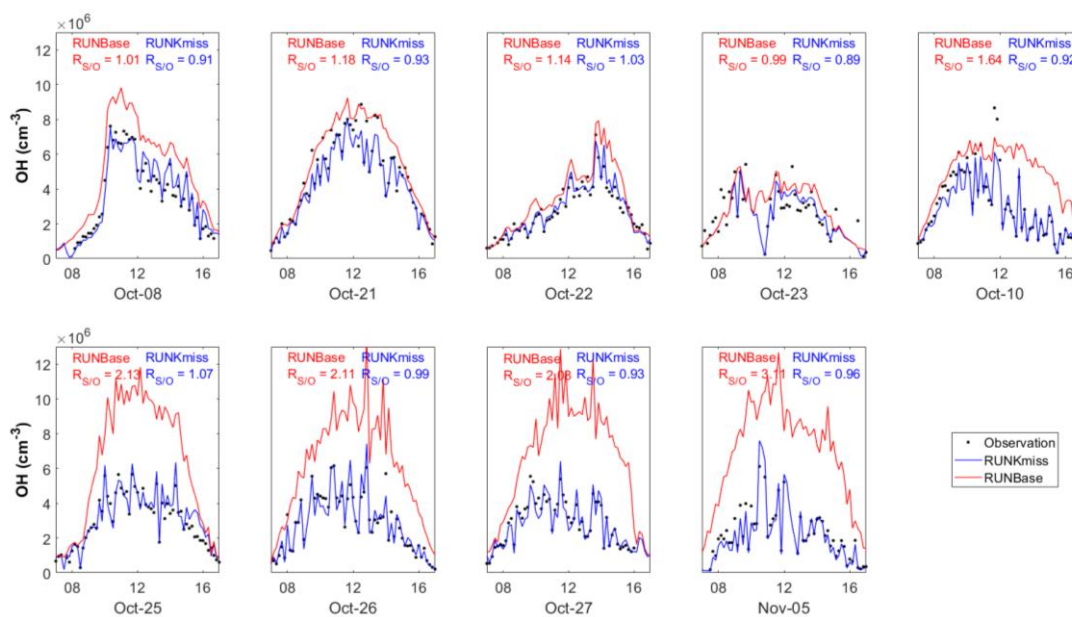



1 Figure S6. Nine-day comparison between observed OH and simulated OH with (RUNBase)  
2 and without (RUNKmiss) addition reactivity.

3

4 **Reference:**

5 Berresheim, H., Elste, T., Tremmel, H. G., Allen, A. G., Hansson, H.-C., Rosman, K., Dal Maso, M., Mäkelä,  
6 J. M., Kulmala, M., and O'Dowd, C. D.: Gas-aerosol relationships of H<sub>2</sub>SO<sub>4</sub>, MSA, and OH: Observations  
7 in the coastal marine boundary layer at Mace Head, Ireland, *Journal of Geophysical Research:*  
8 *Atmospheres*, 107, PAR 5-1-PAR 5-12, <https://doi.org/10.1029/2000JD000229>, 2002.

9 Berresheim, H., McGrath, J., Adam, M., Mauldin, R. L., Bohn, B., and Rohrer, F.: Seasonal measurements  
10 of OH, NO<sub>x</sub>, and J(O<sup>1</sup>D) at Mace Head, Ireland, *Geophys. Res. Lett.*, 40, 1659–1663,  
11 <https://doi.org/10.1002/grl.50345>, 2013.

12 Berresheim, H., Adam, M., Monahan, C., O'Dowd, C., Plane, J. M. C., Bohn, B., and Rohrer, F.: Missing  
13 SO<sub>2</sub> oxidant in the coastal atmosphere? – observations from high-resolution measurements of OH  
14 and atmospheric sulfur compounds, *Atmospheric Chemistry and Physics*, 14, 12209–12223,  
15 <https://doi.org/10.5194/acp-14-12209-2014>, 2014.

16 Bloss, W. J., Lee, J. D., Heard, D. E., Salmon, R. A., Bauguitte, S. J.-B., Roscoe, H. K., and Jones, A. E.:  
17 Observations of OH and HO<sub>2</sub> radicals in coastal Antarctica, *Atmospheric Chemistry and Physics*, 7,  
18 4171–4185, <https://doi.org/10.5194/acp-7-4171-2007>, 2007.

19 Cantrell, C. A., Zimmer, A., and Tyndall, G. S.: Absorption cross sections for water vapor from 183 to  
20 193 nm, *Geophys. Res. Lett.*, 24, 2195–2198, <https://doi.org/10.1029/97GL02100>, 1997.

21 Carslaw, N., Creasey, D. J., Heard, D. E., Lewis, A. C., McQuaid, J. B., Pilling, M. J., Monks, P. S., Bandy,  
22 B. J., and Penkett, S. A.: Modeling OH, HO<sub>2</sub>, and RO<sub>2</sub> radicals in the marine boundary layer: 1. Model  
23 construction and comparison with field measurements, *J. Geophys. Res.*, 104, 30241–30255,  
24 <https://doi.org/10.1029/1999JD900783>, 1999.

25 Chen, S., Ren, X., Mao, J., Chen, Z., Brune, W. H., Lefer, B., Rappenglück, B., Flynn, J., Olson, J., and  
26 Crawford, J. H.: A comparison of chemical mechanisms based on TRAMP-2006 field data, *Atmospheric*  
27 *Environment*, 44, 4116–4125, <https://doi.org/10.1016/j.atmosenv.2009.05.027>, 2010.

28 Creasey, D. J., Evans, G. E., and Heard, D. E.: Measurements of OH and HO<sub>2</sub> concentrations in the  
29 Southern Ocean marine boundary layer, *J. Geophys. Res.*, 108, 4475,  
30 <https://doi.org/10.1029/2002JD003206>, 2003.

31 Dusanter, S., Vimal, D., Stevens, P. S., Volkamer, R., and Molina, L. T.: Measurements of OH and HO<sub>2</sub>  
32 concentrations during the MCMA-2006 field campaign – Part 1: Deployment of the Indiana University  
33 laser-induced fluorescence instrument, *Atmospheric Chemistry and Physics*, 9, 1665–1685,  
34 <https://doi.org/10.5194/acp-9-1665-2009>, 2009a.

35 Dusanter, S., Vimal, D., Stevens, P. S., Volkamer, R., Molina, L. T., Baker, A., Meinardi, S., Blake, D.,

1 Sheehy, P., Merten, A., Zhang, R., Zheng, J., Fortner, E. C., Junkermann, W., Dubey, M., Rahn, T.,  
2 Eichinger, B., Lewandowski, P., Prueger, J., and Holder, H.: Measurements of OH and HO<sub>2</sub>  
3 concentrations during the MCMA-2006 field campaign – Part 2: Model comparison and radical  
4 budget, *Atmospheric Chemistry and Physics*, 9, 6655–6675, [https://doi.org/10.5194/acp-9-6655-](https://doi.org/10.5194/acp-9-6655-2009)  
5 2009, 2009b.

6 Emmerson, K. M., Carslaw, N., Carslaw, D. C., Lee, J. D., McFiggans, G., Bloss, W. J., Gravestock, T.,  
7 Heard, D. E., Hopkins, J., Ingham, T., Pilling, M. J., Smith, S. C., Jacob, M., and Monks, P. S.: Free radical  
8 modelling studies during the UK TORCH Campaign in Summer 2003, *Atmos. Chem. Phys.*, 15, 2007.

9 Feiner, P. A., Brune, W. H., Miller, D. O., Zhang, L., Cohen, R. C., Romer, P. S., Goldstein, A. H., Keutsch,  
10 F. N., Skog, K. M., Wennberg, P. O., Nguyen, T. B., Teng, A. P., DeGouw, J., Koss, A., Wild, R. J., Brown,  
11 S. S., Guenther, A., Edgerton, E., Baumann, K., and Fry, J. L.: Testing Atmospheric Oxidation in an  
12 Alabama Forest, *Journal of the Atmospheric Sciences*, 73, 4699–4710, [https://doi.org/10.1175/JAS-](https://doi.org/10.1175/JAS-D-16-0044.1)  
13 D-16-0044.1, 2016.

14 Griffith, S. M., Hansen, R. F., Dusanter, S., Stevens, P. S., Alaghmand, M., Bertman, S. B., Carroll, M. A.,  
15 Erickson, M., Galloway, M., Grossberg, N., Hottle, J., Hou, J., Jobson, B. T., Kammrath, A., Keutsch, F. N.,  
16 Lefer, B. L., Mielke, L. H., O'Brien, A., Shepson, P. B., Thurlow, M., Wallace, W., Zhang, N., and Zhou, X.  
17 L.: OH and HO<sub>2</sub> radical chemistry during PROPHET 2008 and CABINEX 2009 - Part 1: Measurements  
18 and model comparison, *Atmospheric Chemistry and Physics*, 13, 5403–5423,  
19 <https://doi.org/10.5194/acp-13-5403-2013>, 2013.

20 Griffith, S. M., Hansen, R. F., Dusanter, S., Michoud, V., Gilman, J. B., Kuster, W. C., Veres, P. R., Graus,  
21 M., Gouw, J. A., Roberts, J., Young, C., Washenfelder, R., Brown, S. S., Thalman, R., Waxman, E.,  
22 Volkamer, R., Tsai, C., Stutz, J., Flynn, J. H., Grossberg, N., Lefer, B., Alvarez, S. L., Rappenglueck, B.,  
23 Mielke, L. H., Osthoff, H. D., and Stevens, P. S.: Measurements of hydroxyl and hydroperoxy radicals  
24 during CalNex-LA: Model comparisons and radical budgets, *J. Geophys. Res. Atmos.*, 121, 4211–4232,  
25 <https://doi.org/10.1002/2015JD024358>, 2016.

26 Handisides, G. M.: Hohenpeissenberg Photochemical Experiment (HOPE 2000): Measurements and  
27 photostationary state calculations of OH and peroxy radicals, *Atmos. Chem. Phys.*, 24, 2003.

28 Hens, K., Novelli, A., Martinez, M., Auld, J., Axinte, R., Bohn, B., Fischer, H., Keronen, P., Kubistin, D.,  
29 Nölscher, A. C., Oswald, R., Paasonen, P., Petäjä, T., Regelin, E., Sander, R., Sinha, V., Sipilä, M.,  
30 Taraborrelli, D., Tatum Ernest, C., Williams, J., Lelieveld, J., and Harder, H.: Observation and modelling  
31 of HO<sub>x</sub> radicals in a boreal forest, *Atmospheric Chemistry and Physics*, 14, 8723–8747,  
32 <https://doi.org/10.5194/acp-14-8723-2014>, 2014.

33 Hofzumahaus, A., Rohrer, F., Lu, K., Bohn, B., Brauers, T., Chang, C.-C., Fuchs, H., Holland, F., Kita, K.,  
34 Kondo, Y., Li, X., Lou, S., Shao, M., Zeng, L., Wahner, A., and Zhang, Y.: Amplified Trace Gas Removal  
35 in the Troposphere, *Science*, 324, 1702–1704, <https://doi.org/10.1126/science.1164566>, 2009.

36 Holland, F., Hofzumahaus, A., Schäfer, J., and Kraus, A.: Measurements of OH and HO<sub>2</sub> radical  
37 concentrations and photolysis frequencies during BERLIOZ, *J. Geophys. Res.*, 108, 8246,  
38 <https://doi.org/10.1029/2001JD001393>, 2003.

- 1 Jeong, D., Seco, R., Emmons, L., Schwantes, R., Liu, Y., McKinney, K. A., Martin, S. T., Keutsch, F. N., Gu,  
2 D., Guenther, A. B., Vega, O., Tota, J., Souza, R. A. F., Springston, S. R., Watson, T. B., and Kim, S.:  
3 Reconciling Observed and Predicted Tropical Rainforest OH Concentrations, *JGR Atmospheres*, 127,  
4 <https://doi.org/10.1029/2020JD032901>, 2022.
- 5 Kaiser, J., Skog, K. M., Baumann, K., Bertman, S. B., Brown, S. B., Brune, W. H., Crouse, J. D., de Gouw,  
6 J. A., Edgerton, E. S., Feiner, P. A., Goldstein, A. H., Koss, A., Misztal, P. K., Nguyen, T. B., Olson, K. F., St.  
7 Clair, J. M., Teng, A. P., Toma, S., Wennberg, P. O., Wild, R. J., Zhang, L., and Keutsch, F. N.: Speciation  
8 of OH reactivity above the canopy of an isoprene-dominated forest, *Atmos. Chem. Phys.*, 16, 9349–  
9 9359, <https://doi.org/10.5194/acp-16-9349-2016>, 2016.
- 10 Kanaya, Y., Cao, R., Kato, S., Miyakawa, Y., Kajii, Y., Tanimoto, H., Yokouchi, Y., Mochida, M., Kawamura,  
11 K., and Akimoto, H.: Chemistry of OH and HO<sub>2</sub> radicals observed at Rishiri Island, Japan, in September  
12 2003: Missing daytime sink of HO<sub>2</sub> and positive nighttime correlations with monoterpenes, *J. Geophys.*  
13 *Res.*, 112, D11308, <https://doi.org/10.1029/2006JD007987>, 2007a.
- 14 Kanaya, Y., Cao, R., Akimoto, H., Fukuda, M., Komazaki, Y., Yokouchi, Y., Koike, M., Tanimoto, H.,  
15 Takegawa, N., and Kondo, Y.: Urban photochemistry in central Tokyo: 1. Observed and modeled OH  
16 and HO<sub>2</sub> radical concentrations during the winter and summer of 2004, *J. Geophys. Res.*, 112, D21312,  
17 <https://doi.org/10.1029/2007JD008670>, 2007b.
- 18 Kim, S., Wolfe, G. M., Mauldin, L., Cantrell, C., Guenther, A., Karl, T., Turnipseed, A., Greenberg, J., Hall,  
19 S. R., Ullmann, K., Apel, E., Hornbrook, R., Kajii, Y., Nakashima, Y., Keutsch, F. N., DiGangi, J. P., Henry,  
20 S. B., Kaser, L., Schnitzhofer, R., Graus, M., Hansel, A., Zheng, W., and Flocke, F. F.: Evaluation of HO<sub>x</sub>  
21 sources and cycling using measurement-constrained model calculations in a 2-methyl-3-butene-2-  
22 ol (MBO) and monoterpene (MT) dominated ecosystem, *Atmospheric Chemistry and Physics*, 13,  
23 2031–2044, <https://doi.org/10.5194/acp-13-2031-2013>, 2013.
- 24 Kukui, A., Ancellet, G., and Le Bras, G.: Chemical ionisation mass spectrometer for measurements of  
25 OH and Peroxy radical concentrations in moderately polluted atmospheres, *J Atmos Chem*, 61, 133–  
26 154, <https://doi.org/10.1007/s10874-009-9130-9>, 2008.
- 27 Kukui, A., Legrand, M., Preunkert, S., Frey, M. M., Loisil, R., Gil Roca, J., Jourdain, B., King, M. D., France,  
28 J. L., and Ancellet, G.: Measurements of OH and RO<sub>2</sub> radicals at Dome C, East Antarctica, *Atmospheric*  
29 *Chemistry and Physics*, 14, 12373–12392, <https://doi.org/10.5194/acp-14-12373-2014>, 2014.
- 30 Kürten, A., Rondo, L., Ehrhart, S., and Curtius, J.: Calibration of a Chemical Ionization Mass  
31 Spectrometer for the Measurement of Gaseous Sulfuric Acid, *J. Phys. Chem. A*, 116, 6375–6386,  
32 <https://doi.org/10.1021/jp212123n>, 2012.
- 33 Lelieveld, J., Butler, T. M., Crowley, J. N., Dillon, T. J., Fischer, H., Ganzeveld, L., Harder, H., Lawrence,  
34 M. G., Martinez, M., Taraborrelli, D., and Williams, J.: Atmospheric oxidation capacity sustained by a  
35 tropical forest, *Nature*, 452, 737–740, <https://doi.org/10.1038/nature06870>, 2008.
- 36 Lew, M. M., Rickly, P. S., Bottorff, B. P., Reidy, E., Sklaveniti, S., Léonardis, T., Locoge, N., Dusanter, S.,  
37 Kundu, S., Wood, E., and Stevens, P. S.: OH and HO<sub>2</sub> radical chemistry in a midlatitude forest:

1 measurements and model comparisons, *Atmospheric Chemistry and Physics*, 20, 9209–9230,  
2 <https://doi.org/10.5194/acp-20-9209-2020>, 2020.

3 Liao, J., Huey, L. G., Tanner, D. J., Brough, N., Brooks, S., Dibb, J. E., Stutz, J., Thomas, J. L., Lefer, B.,  
4 Haman, C., and Gorham, K.: Observations of hydroxyl and peroxy radicals and the impact of BrO at  
5 Summit, Greenland in 2007 and 2008, *Atmos. Chem. Phys.*, 11, 8577–8591,  
6 <https://doi.org/10.5194/acp-11-8577-2011>, 2011.

7 Lu, K., Fuchs, H., Hofzumahaus, A., Tan, Z., Wang, H., Zhang, L., Schmitt, S. H., Rohrer, F., Bohn, B.,  
8 Broch, S., Dong, H., Gkatzelis, G. I., Hohaus, T., Holland, F., Li, X., Liu, Y., Liu, Y., Ma, X., Novelli, A.,  
9 Schlag, P., Shao, M., Wu, Y., Wu, Z., Zeng, L., Hu, M., Kiendler-Scharr, A., Wahner, A., and Zhang, Y.:  
10 Fast Photochemistry in Wintertime Haze: Consequences for Pollution Mitigation Strategies, *Environ.*  
11 *Sci. Technol.*, 53, 10676–10684, <https://doi.org/10.1021/acs.est.9b02422>, 2019.

12 Lu, K. D., Rohrer, F., Holland, F., Fuchs, H., Bohn, B., Brauers, T., Chang, C. C., Häsel, R., Hu, M., Kita,  
13 K., Kondo, Y., Li, X., Lou, S. R., Nehr, S., Shao, M., Zeng, L. M., Wahner, A., Zhang, Y. H., and  
14 Hofzumahaus, A.: Observation and modelling of OH and HO<sub>2</sub> concentrations in the Pearl River Delta  
15 2006: a missing OH source in a VOC rich atmosphere, *Atmospheric Chemistry and Physics*, 12, 1541–  
16 1569, <https://doi.org/10.5194/acp-12-1541-2012>, 2012.

17 Lu, K. D., Hofzumahaus, A., Holland, F., Bohn, B., Brauers, T., Fuchs, H., Hu, M., Häsel, R., Kita, K.,  
18 Kondo, Y., Li, X., Lou, S. R., Oebel, A., Shao, M., Zeng, L. M., Wahner, A., Zhu, T., Zhang, Y. H., and  
19 Rohrer, F.: Missing OH source in a suburban environment near Beijing: observed and modelled OH  
20 and HO<sub>2</sub> concentrations in summer 2006, *Atmospheric Chemistry and Physics*, 13, 1057–1080,  
21 <https://doi.org/10.5194/acp-13-1057-2013>, 2013.

22 Ma, X., Tan, Z., Lu, K., Yang, X., Liu, Y., Li, S., Li, X., Chen, S., Novelli, A., Cho, C., Zeng, L., Wahner, A.,  
23 and Zhang, Y.: Winter photochemistry in Beijing: Observation and model simulation of OH and HO<sub>2</sub>  
24 radicals at an urban site, *Science of The Total Environment*, 685, 85–95,  
25 <https://doi.org/10.1016/j.scitotenv.2019.05.329>, 2019.

26 Mao, J., Ren, X., Chen, S., Brune, W. H., Chen, Z., Martinez, M., Harder, H., Lefer, B., Rappenglück, B.,  
27 Flynn, J., and Leuchner, M.: Atmospheric oxidation capacity in the summer of Houston 2006:  
28 Comparison with summer measurements in other metropolitan studies, *Atmospheric Environment*,  
29 44, 4107–4115, <https://doi.org/10.1016/j.atmosenv.2009.01.013>, 2010.

30 Mao, J., Ren, X., Zhang, L., Van Duin, D. M., Cohen, R. C., Park, J.-H., Goldstein, A. H., Paulot, F., Beaver,  
31 M. R., Crouse, J. D., Wennberg, P. O., DiGangi, J. P., Henry, S. B., Keutsch, F. N., Park, C., Schade, G.  
32 W., Wolfe, G. M., Thornton, J. A., and Brune, W. H.: Insights into hydroxyl measurements and  
33 atmospheric oxidation in a California forest, *Atmos. Chem. Phys.*, 12, 8009–8020,  
34 <https://doi.org/10.5194/acp-12-8009-2012>, 2012.

35 Mauldin III, R., Kosciuch, E., Eisele, F., Huey, G., Tanner, D., Sjostedt, S., Blake, D., Chen, G., Crawford,  
36 J., and Davis, D.: South Pole Antarctica observations and modeling results: New insights on HO<sub>x</sub> radical  
37 and sulfur chemistry, *Atmospheric Environment*, 44, 572–581,  
38 <https://doi.org/10.1016/j.atmosenv.2009.07.058>, 2010.

- 1 Mauldin III, R. L., Eisele, F. L., Tanner, D. J., Kosciuch, E., Shetter, R., Lefer, B., Hall, S. R., Nowak, J. B.,  
2 Buhr, M., Chen, G., Wang, P., and Davis, D.: Measurements of OH, H<sub>2</sub>SO<sub>4</sub>, and MSA at the South Pole  
3 during ISCAT, *Geophysical Research Letters*, 28, 3629–3632, <https://doi.org/10.1029/2000GL012711>,  
4 2001.
- 5 Novelli, A., Vereecken, L., Lelieveld, J., and Harder, H.: Direct observation of OH formation from  
6 stabilised Criegee intermediates, *Phys. Chem. Chem. Phys.*, 16, 19941–19951,  
7 <https://doi.org/10.1039/C4CP02719A>, 2014.
- 8 Petäjä, T., Mauldin, I. I. I., Kosciuch, E., McGrath, J., Nieminen, T., Paasonen, P., Boy, M., Adamov, A.,  
9 Kotiaho, T., and Kulmala, M.: Sulfuric acid and OH concentrations in a boreal forest site, *Atmospheric  
10 Chemistry and Physics*, 9, 7435–7448, <https://doi.org/10.5194/acp-9-7435-2009>, 2009.
- 11 Pugh, T. A. M., MacKenzie, A. R., Hewitt, C. N., Langford, B., Edwards, P. M., Furneaux, K. L., Heard, D.  
12 E., Hopkins, J. R., Jones, C. E., Karunaharan, A., Lee, J., Mills, G., Misztal, P., Moller, S., Monks, P. S., and  
13 Whalley, L. K.: Simulating atmospheric composition over a South-East Asian tropical rainforest:  
14 performance of a chemistry box model, *Atmos. Chem. Phys.*, 20, 2010.
- 15 Ren, X.: HO<sub>x</sub> concentrations and OH reactivity observations in New York City during PMTACS-NY2001,  
16 *Atmospheric Environment*, 37, 3627–3637, [https://doi.org/10.1016/S1352-2310\(03\)00460-6](https://doi.org/10.1016/S1352-2310(03)00460-6), 2003a.
- 17 Ren, X.: OH and HO<sub>2</sub> Chemistry in the urban atmosphere of New York City, *Atmospheric Environment*,  
18 37, 3639–3651, [https://doi.org/10.1016/S1352-2310\(03\)00459-X](https://doi.org/10.1016/S1352-2310(03)00459-X), 2003b.
- 19 Ren, X., Brune, W. H., Oligier, A., Metcalf, A. R., Simpas, J. B., Shirley, T., Schwab, J. J., Bai, C.,  
20 Roychowdhury, U., Li, Y., Cai, C., Demerjian, K. L., He, Y., Zhou, X., Gao, H., and Hou, J.: OH, HO<sub>2</sub>, and  
21 OH reactivity during the PMTACS-NY Whiteface Mountain 2002 campaign: Observations and model  
22 comparison: HO<sub>x</sub> DURING PMTACS-NY WHITEFACE 2002, *J. Geophys. Res.*, 111, n/a-n/a,  
23 <https://doi.org/10.1029/2005JD006126>, 2006.
- 24 Ren, X., van Duin, D., Cazorla, M., Chen, S., Mao, J., Zhang, L., Brune, W. H., Flynn, J. H., Grossberg, N.,  
25 Lefer, B. L., Rappenglück, B., Wong, K. W., Tsai, C., Stutz, J., Dibb, J. E., Thomas Jobson, B., Luke, W. T.,  
26 and Kelley, P.: Atmospheric oxidation chemistry and ozone production: Results from SHARP 2009 in  
27 Houston, Texas: ATMOSPHERIC PHOTOCHEMISTRY IN HOUSTON, *J. Geophys. Res. Atmos.*, 118,  
28 5770–5780, <https://doi.org/10.1002/jgrd.50342>, 2013.
- 29 Rohrer, F. and Berresheim, H.: Strong correlation between levels of tropospheric hydroxyl radicals and  
30 solar ultraviolet radiation, *Nature*, 442, 184–187, <https://doi.org/10.1038/nature04924>, 2006.
- 31 Sjostedt, S. J., Huey, L. G., Tanner, D. J., Peischl, J., Chen, G., Dibb, J. E., Lefer, B., Hutterli, M. A.,  
32 Beyersdorf, A. J., Blake, N. J., Blake, D. R., Sueper, D., Ryerson, T., Burkhardt, J., and Stohl, A.:  
33 Observations of hydroxyl and the sum of peroxy radicals at Summit, Greenland during summer 2003,  
34 *Atmospheric Environment*, 41, 5122–5137, <https://doi.org/10.1016/j.atmosenv.2006.06.065>, 2007.
- 35 Slater, E. J., Whalley, L. K., Woodward-Massey, R., Ye, C., Lee, J. D., Squires, F., Hopkins, J. R., Dunmore,  
36 R. E., Shaw, M., Hamilton, J. F., Lewis, A. C., Crilley, L. R., Kramer, L., Bloss, W., Vu, T., Sun, Y., Xu, W.,

1 Yue, S., Ren, L., Acton, W. J. F., Hewitt, C. N., Wang, X., Fu, P., and Heard, D. E.: Elevated levels of OH  
2 observed in haze events during wintertime in central Beijing, *Atmospheric Chemistry and Physics*, 20,  
3 14847–14871, <https://doi.org/10.5194/acp-20-14847-2020>, 2020.

4 Sommariva, R., Lewis, A. C., Pilling, M. J., and Zador, J.: OH and HO<sub>2</sub> chemistry in clean marine air  
5 during SOAPEX-2, *Atmos. Chem. Phys.*, 18, 2004.

6 Tan, Z., Fuchs, H., Lu, K., Hofzumahaus, A., Bohn, B., Broch, S., Dong, H., Gomm, S., Häsel, R., He, L.,  
7 Holland, F., Li, X., Liu, Y., Lu, S., Rohrer, F., Shao, M., Wang, B., Wang, M., Wu, Y., Zeng, L., Zhang, Y.,  
8 Wahner, A., and Zhang, Y.: Radical chemistry at a rural site (Wangdu) in the North China Plain:  
9 observation and model calculations of OH, HO<sub>2</sub> and RO<sub>2</sub> radicals, *Atmospheric Chemistry and Physics*,  
10 17, 663–690, <https://doi.org/10.5194/acp-17-663-2017>, 2017.

11 Tan, Z., Lu, K., Hofzumahaus, A., Fuchs, H., Bohn, B., Holland, F., Liu, Y., Rohrer, F., Shao, M., Sun, K.,  
12 Wu, Y., Zeng, L., Zhang, Y., Zou, Q., Kiendler-Scharr, A., Wahner, A., and Zhang, Y.: Experimental  
13 budgets of OH, HO<sub>2</sub>, and RO<sub>2</sub> radicals and implications for ozone formation in the Pearl River Delta  
14 in China 2014, *Atmospheric Chemistry and Physics*, 19, 7129–7150, <https://doi.org/10.5194/acp-19-7129-2019>, 2019.

16 Tanner, D. J., Jefferson, A., and Eisele, F. L.: Selected ion chemical ionization mass spectrometric  
17 measurement of OH, *J. Geophys. Res.*, 102, 6415–6425, <https://doi.org/10.1029/96JD03919>, 1997.

18 Volz-Thomas, A., Pätz, H.-W., Houben, N., Konrad, S., and Mihelcic, D.: Inorganic trace gases and  
19 peroxy radicals during BERLIOZ at Pabstthum: An investigation of the photostationary state of NO<sub>x</sub>  
20 and O<sub>3</sub>, *J. Geophys. Res.*, 108, 8248, <https://doi.org/10.1029/2001JD001255>, 2003a.

21 Volz-Thomas, A., Geiss, H., and Andreas, H.: Introduction to Special Section: Photochemistry  
22 Experiment in BERLIOZ, *J. Geophys. Res.*, 108, 8252, <https://doi.org/10.1029/2001JD002029>, 2003b.

23 Wang, F., Hu, R., Chen, H., Xie, P., Wang, Y., Li, Z., Jin, H., Liu, J., and Liu, W.: Development of a field  
24 system for measurement of tropospheric OH radical using laser-induced fluorescence technique, *Opt.*  
25 *Express*, 27, A419, <https://doi.org/10.1364/OE.27.00A419>, 2019.

26 Wang, G., Iradukunda, Y., Shi, G., Sanga, P., Niu, X., and Wu, Z.: Hydroxyl, hydroperoxyl free radicals  
27 determination methods in atmosphere and troposphere, *Journal of Environmental Sciences*, 99, 324–  
28 335, <https://doi.org/10.1016/j.jes.2020.06.038>, 2021.

29 Whalley, L. K., Edwards, P. M., Furneaux, K. L., Goddard, A., Ingham, T., Evans, M. J., Stone, D., Hopkins,  
30 J. R., Jones, C. E., Karunaharan, A., Lee, J. D., Lewis, A. C., Monks, P. S., Moller, S. J., and Heard, D. E.:  
31 Quantifying the magnitude of a missing hydroxyl radical source in a tropical rainforest, *Atmos. Chem.*  
32 *Phys.*, 11, 7223–7233, <https://doi.org/10.5194/acp-11-7223-2011>, 2011.

33 Whalley, L. K., Stone, D., Dunmore, R., Hamilton, J., Hopkins, J. R., Lee, J. D., Lewis, A. C., Williams, P.,  
34 Kleffmann, J., Laufs, S., Woodward-Massey, R., and Heard, D. E.: Understanding in situ ozone  
35 production in the summertime through radical observations and modelling studies during the Clean  
36 air for London project (ClearLo), *Atmos. Chem. Phys.*, 18, 2547–2571, <https://doi.org/10.5194/acp-18-2547-2018>, 2018.

- 1 18-2547-2018, 2018.
- 2 Whalley, L. K., Slater, E. J., Woodward-Massey, R., Ye, C., Lee, J. D., Squires, F., Hopkins, J. R., Dunmore,  
3 R. E., Shaw, M., Hamilton, J. F., Lewis, A. C., Mehra, A., Worrall, S. D., Bacak, A., Bannan, T. J., Coe, H.,  
4 Percival, C. J., Ouyang, B., Jones, R. L., Crilley, L. R., Kramer, L. J., Bloss, W. J., Vu, T., Kotthaus, S.,  
5 Grimmond, S., Sun, Y., Xu, W., Yue, S., Ren, L., Acton, W. J. F., Hewitt, C. N., Wang, X., Fu, P., and Heard,  
6 D. E.: Evaluating the sensitivity of radical chemistry and ozone formation to ambient VOCs and NO<sub>x</sub>  
7 in Beijing, *Atmospheric Chemistry and Physics*, 21, 2125–2147, [https://doi.org/10.5194/acp-21-2125-](https://doi.org/10.5194/acp-21-2125-2021)  
8 2021, 2021.
- 9 Wolfe, G. M., Cantrell, C., Kim, S., Mauldin III, R. L., Karl, T., Harley, P., Turnipseed, A., Zheng, W., Flocke,  
10 F., Apel, E. C., Hornbrook, R. S., Hall, S. R., Ullmann, K., Henry, S. B., DiGangi, J. P., Boyle, E. S., Kaser, L.,  
11 Schnitzhofer, R., Hansel, A., Graus, M., Nakashima, Y., Kajii, Y., Guenther, A., and Keutsch, F. N.: Missing  
12 peroxy radical sources within a summertime ponderosa pine forest, *Atmos. Chem. Phys.*, 14, 4715–  
13 4732, <https://doi.org/10.5194/acp-14-4715-2014>, 2014.
- 14 Zhang, G., Hu, R., Xie, P., Lu, K., Lou, S., Liu, X., Li, X., Wang, F., Wang, Y., Yang, X., Cai, H., Wang, Y.,  
15 and Liu, W.: Intercomparison of OH radical measurement in a complex atmosphere in Chengdu, China,  
16 *Science of The Total Environment*, 838, 155924, <https://doi.org/10.1016/j.scitotenv.2022.155924>,  
17 2022a.
- 18 Zhang, G., Hu, R., Xie, P., Lou, S., Wang, F., Wang, Y., Qin, M., Li, X., Liu, X., Wang, Y., and Liu, W.:  
19 Observation and simulation of HO<sub>x</sub> radicals in an urban area in Shanghai, China, *Science of The Total*  
20 *Environment*, 810, 152275, <https://doi.org/10.1016/j.scitotenv.2021.152275>, 2022b.

21
